1 Nutrient availability shifts the biosynthetic potential of soil-derived microbial communities

2

3 Marc G Chevrette<sup>1</sup>, Bradley Himes<sup>2</sup>, Camila Carlos-Shanley<sup>2\*</sup>

4 <sup>1</sup> Wisconsin Institute for Discovery and Department of Plant Pathology, University of Wisconsin-

5 Madison, Madison, WI, 53715

6 <sup>2</sup> Department of Biology, Texas State University, San Marcos, 78666, TX

7

8 \*corresponding author Camila Carlos-Shanley

9 Department of Biology

10 Texas State University

11 601 University Drive

12 San Marcos, TX 78666

13 (512) 245-5283 (voice)

14 (512) 245-8713 (fax)

15 carlos-shanley@txstate.edu

16

17 **keywords:** microbial community, biosynthetic gene clusters, microbial enrichment, nutrient  
18 availability, growth inhibition assays.

19

20

21

22

## 23 **Abstract**

24 Secondary metabolites produced by microorganisms are the main source of antimicrobials other  
25 pharmaceutical drugs. Soil microbes have been the primary discovery source for these secondary  
26 metabolites, often producing complex organic compounds with specific biological activities.  
27 Research suggests that secondary metabolism broadly shapes microbial ecological interactions,  
28 but little is known about the factors that shape the abundance, distribution, and diversity of  
29 biosynthetic gene clusters in the context of microbial communities. In this study, we investigate  
30 the role of nutrient availability on the abundance of biosynthetic gene clusters in soil-derived  
31 microbial consortia. We found that soil microbial consortia enriched in medium with 150 mg/L of  
32 glucose and 200 mg/L of trehalose (here defined as high sugar) had more biosynthetic gene cluster  
33 and higher inhibitory activity than soil microbial consortia enriched in medium with 15 mg/L of  
34 glucose + 20 mg/L of trehalose (here defined as low sugar). Our results demonstrate that laboratory  
35 microbial communities are a promising tool to study ecology of specialized metabolites.

36

## 37 **Introduction**

38 The chemical products of microbial secondary metabolism (also called natural products) modulate  
39 interactions within and between species and are thus a major means through which the microbial  
40 world communicates [1]. Secondary metabolites have had an enormous impact on modern  
41 medicine: they are the main source of antimicrobials used to treat infections, they have been used  
42 as therapeutics for cancer and other important human diseases, and as immunosuppressants that  
43 enable life-saving transplantation surgeries [2]. Soil microbes have been the primary discovery  
44 source for these secondary metabolites, often producing complex organic compounds with specific  
45 biological activities [3]. The enzymes that assemble microbial natural products are encoded by

46 genes located in biosynthetic gene clusters (BGCs). While it is widely hypothesized that secondary  
47 metabolism broadly shapes microbial ecological interactions, little is known about the factors that  
48 shape the abundance, distribution, and diversity of biosynthetic gene clusters in the context of  
49 microbial communities [4].

50         Some studies have attempted to show the gross differences in biosynthetic potential  
51 between the microbial communities of different soil biomes, but these studies have limited  
52 extrapolative value, and little is known of how environmental factors can contribute to enrichment  
53 for secondary metabolism on finer scales. Comparisons between United States soil communities  
54 from New Hampshire and Arizona suggest that the arid desert soils of Arizona may harbor more  
55 antagonistic, inhibitory compounds than the forest soils of New Hampshire [5]. They observed a  
56 diversity of Nonribosomal peptide synthetases (NRPSs) and polyketide synthases (PKSs) domains  
57 in arid soils when compared with forest soils. One hypothesis is that this is due to the harsh, nutrient  
58 poor conditions of the soil that may lead to increased pressures on nutrient acquisition and/or other  
59 means of competition. Even within soils sourced from the same rhizospheres, biosynthetic capacity  
60 sees shifts depending on soil depth [3]. BGCs and their producing organisms are found in almost  
61 every known microbial niche and covary with some environmental [6]. However, these studies are  
62 often limited to correlative descriptions subject to sampling biases and systematic assessments  
63 with sufficient experimental control remain lacking.

64         Many bacteria dedicate very large portions of their genomes to BGCs, sometimes in excess  
65 of 25% of all genetic material [7], that is often maintained vertically over evolutionary timescales  
66 [8, 9], implying that they are important in their natural settings [8], yet under controlled laboratory  
67 conditions the producers of secondary metabolites often do not express their BGCs, therefore not  
68 producing their chemical products. A growing body of evidence is showing that a battery of

69 different culture conditions and/or perturbations is needed to the production of different elicit  
70 secondary metabolite [10]. Recently, Hurley et al. [11], observed that the taxonomy and inhibitory  
71 profile of the bacteria isolated from four United States soil samples used within the Tiny Earth  
72 project is strongly affect by the selective media used. Potato dextrose agar (PDA) enriched for  
73 strains that inhibited *Acinetobacter baylyi* and *Pseudomonas putida*, while tryptic soy agar (TSA)  
74 enriched for *Erwinia carotavora* inhibiting strains. Understanding the link between secondary  
75 metabolisms and nutrient availability has fundamental implications across microbial ecology,  
76 including the ecology of antagonism, community maintenance, invasion, niche construction, and  
77 niche defense. The aim of this study was to evaluate if carbon source availability can affect the  
78 biosynthetic potential of enriched microbial communities.

79

## 80 **Material and Methods**

### 81 **Sample Collection and community enrichment**

82 Soil sample was collected from the Purgatory Creek Natural Area in San Marcos, Texas  
83 (GPS coordinates 29.882029, -97.982068). The sample came from small field off of a trail  
84 surrounded by a wooded area. Once the sample was taken back to the lab it was passed through a  
85 sieve washed with 70% ethanol to filter out larger particles, the remaining sample was weighed  
86 and then suspended in sterile PBS at a concentration of 1.5 mL of PBS per 0.1 g of soil sample.  
87 Once the suspension had been made it was then used to inoculate six Erlenmeyer flasks containing  
88 50 mL of M63 Minimal Media with a 5 mL/L concentration of SPV-4 Trace elements and a 1  
89 mL/L concentration of MgSO<sub>4</sub>. The three low sugar group flasks (Media LS) contained 15 mg/L  
90 of glucose and 20 mg/L of trehalose while the high sugar group flasks (Media HS) contained 150  
91 mg/L of glucose and 200 mg/L of trehalose. Media LS concentrations of glucose and trehalose

92 were based on Jenkins et al. (2017) [12]. The inoculated flasks were cultured at 30°C and 225 rpm,  
93 the OD600 of the culture was measured every 24 hours to monitor growth stage, the samples grown  
94 in the lower nutrient flasks were called PCA1-3 while those in the higher nutrient flasks were called  
95 PCB1-3. Once stationary phase had been reached samples of each of the flasks were gathered and  
96 then centrifuged, the cell pellets were frozen at -80°C while the supernatant was kept refrigerated  
97 to be used with certain microbes in a 96-well growth assay to determine antimicrobial potential.

98

### 99 **Inhibition assays**

100 To determine if the metabolites produced in the six cultures at stationary phase had  
101 antimicrobial properties an inhibitory assay was developed that measured the inhibitory activity of  
102 the metabolites at different concentrations against a panel of selected bacteria. The bacterial target  
103 panel selected was comprised of bacterial species *Pseudomonas fluorescens* (ATCC13525),  
104 *Klebsiella pneumoniae* (ATCC23357), *Bacillus Subtilis* (ATCC6051), and *Salmonella*  
105 *typhimurium* LT2 (Nickerson-Arizona State). Target bacteria were grown on a 96 well plate  
106 containing 10µL sterile Thermo Scientific Iso-Sensitest broth + 90µL microbial community  
107 supernatant in quadruplicate for each treatment. Growth was measured using optical density at 625  
108 nm via a BioTek plate reader and Gen5 software. Readings were taken at timepoints 0, 24 and 48  
109 hours after inoculation, plates were grown at 37°C and 26°C depending on which bacterial species  
110 was being tested (*P. fluorescens* and *B. subtilis* at 26°C, *K. pneumoniae* and *S. typhimurium* at  
111 37°C). Controls were grown with 90µL of sterile M63 minimal medium with carbon source + 10µL  
112 sterile Thermo Scientific Iso-Sensitest. The optical density data measured from the control was  
113 then used in comparison to the data from each respective community supernatant to determine if

114 the supernatants contained metabolites with inhibitory effects since the growth recorded from the  
115 control plates was in the presence of no antimicrobial metabolites

116

## 117 **Metagenomic DNA Extraction, Sequencing and Analysis**

118 DNA extraction and purification were performed for all six samples using the QIAamp  
119 BiOstic Bacteremia DNA Kit and protocol (QIAGEN). The purified sample DNA was sequenced  
120 at the Microbial Genome Sequencing Center (MiGS) core facility in Pittsburgh on the Illumina  
121 NextSeq platform. Sequence reads were filtered and trimmed using the default settings of fastp  
122 (Chen et al., 2018). Filtered reads were taxonomically classified using the Kaiju software using  
123 the NCBI BLAST nr+euk database [13]. Co-occurrence network was built using the SparCC [14]  
124 program implements in the MicrobiomeAnalyst platform [15] based on the Spearman correlation  
125 between genus distribution across the datasets. Metagenomes were assembled using SPAdes  
126 3.13.0 [16]. Biosynthetic gene clusters (BGCs) were annotated with antiSMASH 5.0 using the  
127 default settings [17]. Contigs with BGCs were taxonomic classified using a Last Common  
128 Ancestor (LCA) approach implemented in the Contig Annotation Tool (CAT) [18]. The short reads  
129 of the metagenome datasets used in this study were deposited in the NCBI Short Read Archive  
130 (SRA) accession numbers from SRR15633242- SRR15633247.

131

## 132 **Results and Discussion**

133 In this study, soil microbial communities were enriched in minimal medium containing  
134 either 15 mg/L of glucose + 20 mg/L of trehalose (here defined as low sugar, LS) or 150 mg/L of  
135 glucose and 200 mg/L of trehalose (here defined as high sugar, HS). The supernatant of the  
136 microbial communities enriched on the high sugar (HS) medium was able to inhibit the growth of

137 *B. subtilis* ( $t=5.413$ ,  $df=3$ ,  $p=0.012$ ), *K. pneumoniae* ( $t=3.846$ ,  $df=3$ ,  $p=0.031$ ), *P. fluorescens*  
138 ( $t=9.565$ ,  $df=3$ ,  $p=0.002$ ) and *S. typhimurium* ( $t=5.249$ ,  $df=3$ ,  $p=0.13$ ). While the supernatant of  
139 the microbial communities enriched on the low sugar (LS) medium was able to inhibit the growth  
140 of *K. pneumoniae* ( $t=4.65$ ,  $df=3$ ,  $p=0.019$ ) and *S. typhimurium* ( $t=4.801$ ,  $df=3$ ,  $p=0.017$ ) (Figure  
141 1). Some studies have found that high concentrations of nutrient, such as glucose, inhibit the  
142 production of secondary metabolites in some bacteria [19]. However, it seems that different carbon  
143 sources can have different effects on the production of secondary metabolites in different bacteria  
144 [20]. To our knowledge, our study is the first to evaluate the effect of glucose and trehalose  
145 concentrations on the inhibitory activity of an undefined microbial consortia. While the approach  
146 used in this study does not enable the identification of the major producers of inhibitory molecules  
147 it allows to study how nutrient availability shapes interspecies interactions.

148         The number of reads in the metagenomic datasets after quality filtering and trimming  
149 ranged from 9 to 10 million. Metagenomic assemblies ranged from 51 to 390 Mb (Table 1).  
150 Taxonomic classification of reads showed that the HS microbial communities were dominated by  
151 fungi, while LS microbial communities were dominated by bacteria (Figure 2a). Previous studies  
152 have evaluated the effect of nutrient availability on microbial community diversity, abundance,  
153 and composition. Experiment with soils amended with glucose found that concentrations higher  
154 than 8mg C/g of soil favored the growth of fungi over bacteria, which the authors attribute to  
155 difference in optimal osmotic potential [21].

156         Functional annotation of the contigs in Clusters of Orthologous Genes (COG) categories  
157 revealed that genes in the “Chromatin structure and dynamics” ( $t=8.214$ ,  $df=4$ ,  $p=0.007$ ) and  
158 “Secondary metabolites biosynthesis, transport, and catabolism” ( $t=5.915$ ,  $df=4$ ,  $p=0.018$ )  
159 categories were overrepresented in the HS microbial communities, while genes in “Signal

160 transduction mechanisms” ( $t=4.156$ ,  $df=4$ ,  $p=0.021$ ) were overrepresented in the LS microbial  
161 communities (Figure 3). Most biosynthetic gene clusters (BGCs) were overrepresented in the HS  
162 microbial communities. Type I Polyketide Synthetase (TIPKS) and Non-Ribosomal Peptide  
163 Synthetase (NPRS) biosynthetic gene clusters were more abundant in the HS communities, while  
164 BGCs encoding bacteriocins and siderophores were more abundant in the LS communities (Table  
165 2). Correlation analysis of microbial genera in the communities revealed many negative  
166 correlations between the two most abundant fungal genera *Trichoderma* and *Fusarium* (both  
167 belonging to the Sordariomycetes class) and bacteria belonging to the Enterobacteriaceae family,  
168 such as *Salmonella* (Figure 4a). Most of BGCs in the HS microbial communities were classified  
169 to the Sordariomycetes taxonomic class, while most of BGCs in the LS microbial communities  
170 were classified to the Actinobacteria taxonomic class (Figure 4b).

171       Microbial communities with more BGCs were showed more inhibitory activity towards the  
172 bacterial pathogens used in this study. Traditionally, inhibition assays and other screening assays  
173 for antimicrobial activity are performed with axenic cultures, and the use of mixed cultures for  
174 antibiotic discovery is still in its early days [22, 23]. It has been hypothesized that co-culture can  
175 activate silent biosynthetic gene clusters and facilitate the discovery of new natural products [24,  
176 25]. In this study we demonstrate that enriched microbial communities derived from environments  
177 with complex microbial communities, such as soil and feces, could be screened for the production  
178 of novel antibacterial compounds.

179

## 180 **Conclusion**

181       In conclusion, in this study we show that laboratory microbial communities are a promising  
182 tool to study ecology of specialized metabolites. Future studies involving fraction libraries,



183 metatranscriptomic, and metabolomic approaches will contribute to our understanding of the  
184 environmental and nutritional conditions that are favorable for production and/or selection of novel  
185 secondary metabolite.

186

## 187 **Acknowledgments**

188 Support for M.G.C. provided by grant 2020-67012-31772 (accession 1022881) from the  
189 USDA National Institute of Food and Agriculture.

190

## 191 **Author contributions**

192 C.C.-S. and B.H. designed the experiments. B.H. performed the experiments. M.G.C. and  
193 C.C.-S. performed bioinformatic and statistical analyses. M.G.C., B.H. and C.C.-S. wrote and  
194 reviewed the manuscript.

195

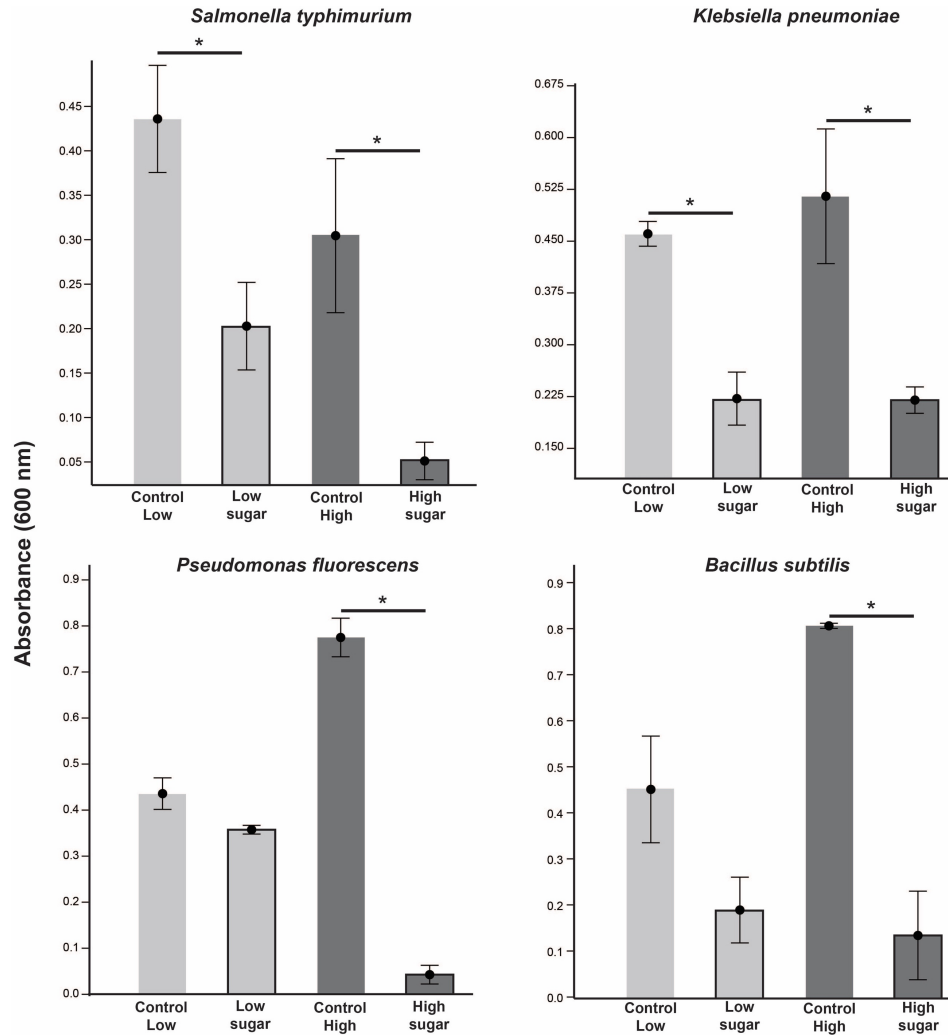

196

197 **Figure 1.** Effect of spent media of soil-derived microbial communities on the growth of

198 *Salmonella typhimurium*, *Klebsiella pneumoniae*, *Pseudomonas fluorescens* and *Bacillus subtilis*.

199 Absorbance at 600 nm was measured after 48h and results shown as average of three experiments.

200 Asterisks (\*) refers to significant comparisons (T-test,  $p < 0.05$ ) between spent media of soil-

201 derived microbial communities growing on low and high sugar medium and the fresh medium

202 control.

203

204

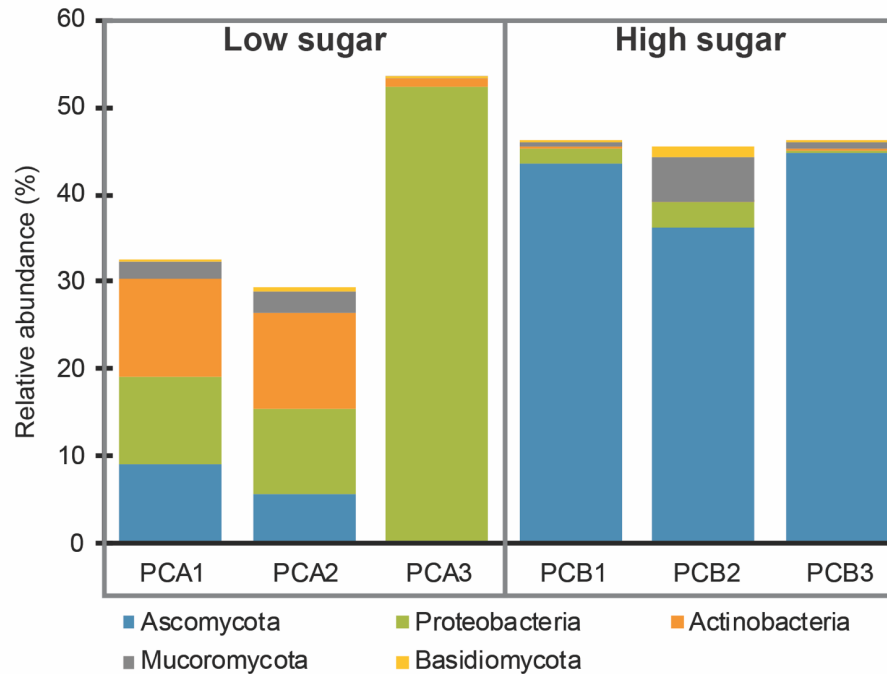

205

206 **Figure 2.** Taxonomic profile of metagenomic reads. Relative abundance of the top 5 phyla.

207 Samples PCA1-3 are biological replicates of the low sugar treatment and PCB1-3 are biological

208 replicates of the high sugar treatment.

209

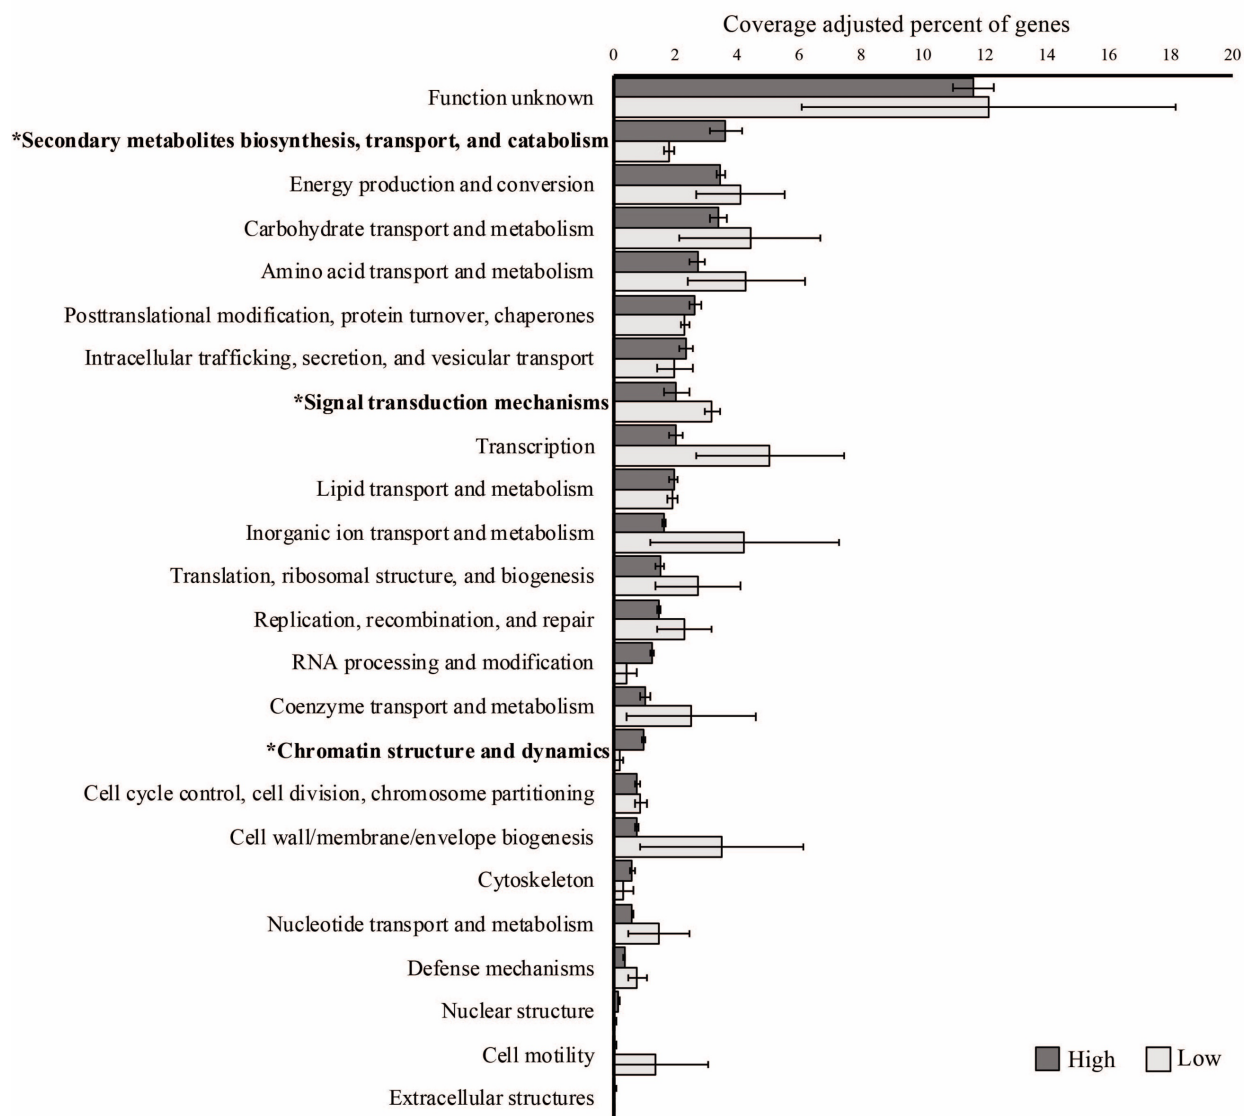

210

211 **Figure 3.** Percentage of genes in COG categories in the low and high sugar microbial communities

212 (coverage adjusted). Values of the categories marked with an asterisk (\*) were significantly

213 different between the treatments (T-test, p-values < 0.05).

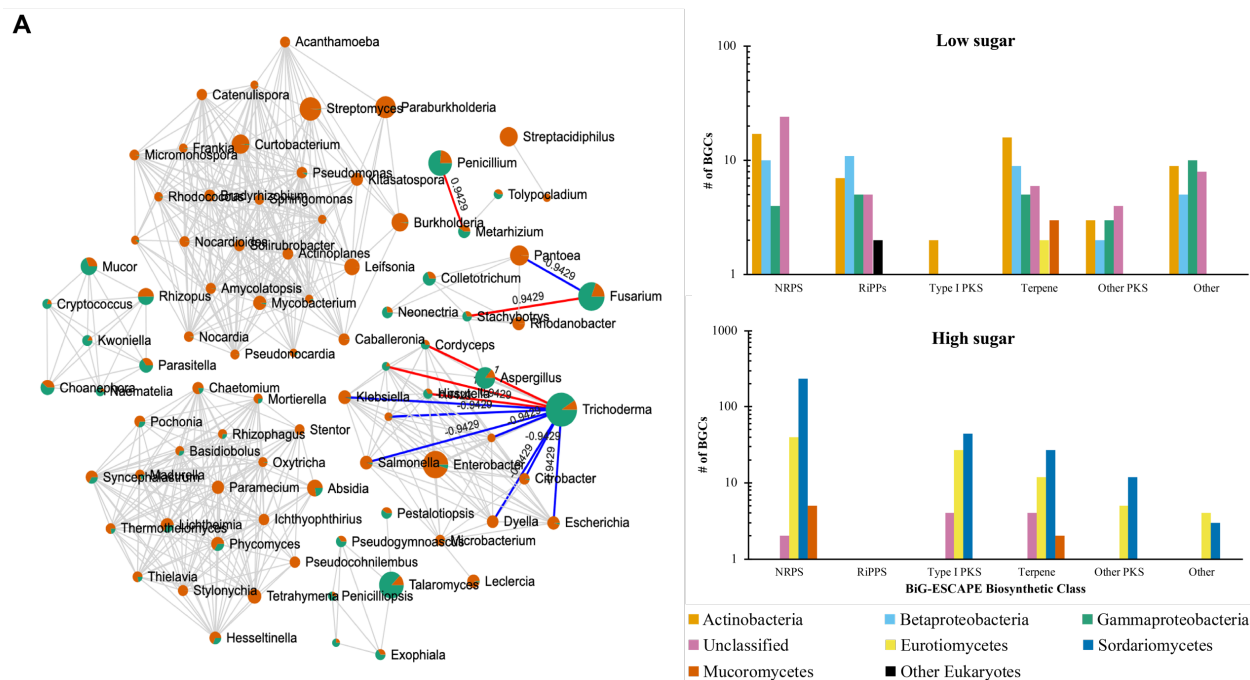

214

215 **Figure 4.** A. Co-occurrence network where nodes are microbial genera and edges are Spearman  
 216 correlation values > 0.8 and with p-value < 0.01. Node size is proportional to genus abundance  
 217 and the average distribution of each genus in the low sugar treatment is shown in orange and in  
 218 the high sugar treatment is shown in green. Negative (blue) and positive (red) correlations of  
 219 *Trichoderma*, *Fusarium* and *Penicillium* are highlighted. B. Distribution of biosynthetic gene  
 220 clusters (BGCs) across microbial class. Contigs with BGCs were taxonomic classified using a Last  
 221 Common Ancestor (LCA) approach. NRPS = Nonribosomal peptide synthetase; PKS = polyketide  
 222 synthase; RiPP = Ribosomally synthesized and post-translationally modified peptide;

223

224

Table 1. Metagenome information.

| Treatment  | Sample | # of million reads | # of Contigs | Assembly length in Mb | GC %   | # of BGCs | Total length of BGC's in Mb | % of base pairs in BGCs |
|------------|--------|--------------------|--------------|-----------------------|--------|-----------|-----------------------------|-------------------------|
| Low sugar  | PCA1   | 9,7                | 1,092,758    | 390.8                 | 0.4975 | 64        | 0.431052                    | 0.11027591              |
|            | PCA2   | 9,8                | 759,937      | 326.9                 | 0.4535 | 65        | 0.703316                    | 0.2150899               |
|            | PCA3   | 9,2                | 81,499       | 51.4                  | 0.5892 | 51        | 0.355935                    | 0.69244013              |
| High sugar | PCB1   | 10,7               | 3,98,017     | 237.9                 | 0.4856 | 139       | 3.543708                    | 1.48934092              |
|            | PCB2   | 10,7               | 621,134      | 325.1                 | 0.4785 | 122       | 1.336774                    | 0.41122777              |
|            | PCB3   | 10,7               | 373,335      | 236.8                 | 0.4902 | 168       | 1.54994                     | 0.65444703              |

BGCs= Biosynthetic gene clusters

Table 2. Distribution of biosynthetic gene cluster (BGC) classes across the metagenomic datasets.

| BGC class   | Low sugar |      |      | High sugar |      |      |
|-------------|-----------|------|------|------------|------|------|
|             | PCA1      | PCA2 | PCA3 | PCB1       | PCB2 | PCB3 |
| NRPS        | 15        | 13   | 12   | 58         | 55   | 91   |
| NRPS-like   | 5         | 5    | 6    | 23         | 32   | 22   |
| terpene     | 21        | 16   | 8    | 16         | 13   | 17   |
| T1PKS       | 1         | 1    | 1    | 32         | 15   | 27   |
| bacteriocin | 7         | 9    | 6    | 0          | 0    | 0    |
| siderophore | 3         | 6    | 3    | 0          | 2    | 0    |
| NRPS T1PKS  | 0         | 1    | 0    | 4          | 3    | 3    |
| other       | 12        | 14   | 15   | 6          | 2    | 8    |

## References

1. Netzker, T., et al., *Microbial communication leading to the activation of silent fungal secondary metabolite gene clusters*. *Frontiers in Microbiology*, 2015. **6**(299).
2. Demain, A.L., *Importance of microbial natural products and the need to revitalize their discovery*. *J Ind Microbiol Biotechnol*, 2014. **41**(2): p. 185-201.
3. Sharrar, A.M., et al., *Bacterial Secondary Metabolite Biosynthetic Potential in Soil Varies with Phylum, Depth, and Vegetation Type*. *mBio*, 2020. **11**(3): p. e00416-20.
4. Borsetto, C., et al., *Microbial community drivers of PK/NRP gene diversity in selected global soils*. *Microbiome*, 2019. **7**(1): p. 78.
5. Charlop-Powers, Z., et al., *Chemical-biogeographic survey of secondary metabolism in soil*. *Proc Natl Acad Sci U S A*, 2014. **111**(10): p. 3757-62.
6. Nayfach, S., et al., *A genomic catalog of Earth's microbiomes*. *Nature Biotechnology*, 2021. **39**(4): p. 499-509.
7. Chevrette, M.G. and C.R. Currie, *Emerging evolutionary paradigms in antibiotic discovery*. *J Ind Microbiol Biotechnol*, 2019. **46**(3-4): p. 257-271.
8. Chevrette, M.G., et al., *Evolutionary dynamics of natural product biosynthesis in bacteria*. *Nat Prod Rep*, 2020. **37**(4): p. 566-599.
9. Chase, A.B., et al., *Vertical inheritance governs biosynthetic gene cluster evolution and chemical diversification*. *bioRxiv*, 2021: p. 2020.12.19.423547.
10. Covington, B.C., F. Xu, and M.R. Seyedsayamdost, *A Natural Product Chemist's Guide to Unlocking Silent Biosynthetic Gene Clusters*. *Annual Review of Biochemistry*, 2021. **90**(1): p. 763-788.
11. Hurley, A., et al., *Tiny Earth: A Big Idea for STEM Education and Antibiotic Discovery*. *mBio*, 2021. **12**(1).
12. Jenkins, S., et al., *Construction of Viable Soil Defined Media Using Quantitative Metabolomics Analysis of Soil Metabolites*. *Frontiers in Microbiology*, 2017. **8**(2618).
13. Menzel, P., K.L. Ng, and A. Krogh, *Fast and sensitive taxonomic classification for metagenomics with Kaiju*. *Nature Communications*, 2016. **7**(1): p. 11257.
14. Friedman, J. and E.J. Alm, *Inferring Correlation Networks from Genomic Survey Data*. *PLOS Computational Biology*, 2012. **8**(9): p. e1002687.
15. Chong, J., et al., *Using MicrobiomeAnalyst for comprehensive statistical, functional, and meta-analysis of microbiome data*. *Nat Protoc*, 2020. **15**(3): p. 799-821.
16. Nurk, S., et al. *Assembling Genomes and Mini-metagenomes from Highly Chimeric Reads*. 2013. Berlin, Heidelberg: Springer Berlin Heidelberg.
17. Blin, K., et al., *antiSMASH 5.0: updates to the secondary metabolite genome mining pipeline*. *Nucleic Acids Research*, 2019. **47**(W1): p. W81-W87.
18. von Meijenfeldt, F.A.B., et al., *Robust taxonomic classification of uncharted microbial sequences and bins with CAT and BAT*. *Genome Biology*, 2019. **20**(1): p. 217.
19. Fender, J.E., et al., *Serratia marcescens quinoprotein glucose dehydrogenase activity mediates medium acidification and inhibition of prodigiosin production by glucose*. *Appl Environ Microbiol*, 2012. **78**(17): p. 6225-35.

20. Sánchez, S., et al., *Carbon source regulation of antibiotic production*. J Antibiot (Tokyo), 2010. **63**(8): p. 442-59.
21. Reischke, S., J. Rousk, and E. Bååth, *The effects of glucose loading rates on bacterial and fungal growth in soil*. Soil Biology and Biochemistry, 2014. **70**: p. 88-95.
22. Westhoff, S., et al., *Competition Sensing Changes Antibiotic Production in Streptomyces*. mBio, 2021. **12**(1).
23. Abrudan, M.I., et al., *Socially mediated induction and suppression of antibiosis during bacterial coexistence*. Proceedings of the National Academy of Sciences, 2015. **112**(35): p. 11054-11059.
24. Zhang, C. and P.D. Straight, *Antibiotic discovery through microbial interactions*. Current Opinion in Microbiology, 2019. **51**: p. 64-71.
25. Ueda, K. and T. Beppu, *Antibiotics in microbial coculture*. The Journal of Antibiotics, 2017. **70**(4): p. 361-365.
